# Supplementary material
Source: PubMed Central journal article supplement (PMC8462066)
Supplement: NIHMS1734160-supplement-009966_-_Supplemental_Material.pdf [file NIHMS1734160-supplement-009966_-_Supplemental_Material.pdf]

## **SUPPLEMENTAL METHODS**

The HRS consensus criteria and the 2016 JCS Guideline criteria are listed below:

### **HRS Expert Consensus Recommendations on Criteria for the Diagnosis of Cardiac Sarcoidosis<sup>10</sup>**

There are two pathways to a diagnosis of cardiac sarcoidosis:

#### **1. Histological diagnosis from myocardial tissue**

Cardiac sarcoidosis is diagnosed in the presence of non-caseating granuloma on histological examination of myocardial tissue with no alternative cause identified (including negative organismal stains if applicable).

#### **2. Clinical diagnosis from invasive and non-invasive studies**

It is probable\* that there is cardiac sarcoidosis if:

- a) There is a histological diagnosis of extra-cardiac sarcoidosis and
- b) One or more of following is present
  - Steroid ± immunosuppressant responsive cardiomyopathy or heart block
  - Unexplained left ventricular ejection fraction (<40%)
  - Unexplained sustained (spontaneous or induced) ventricular tachycardia
  - Mobitz type II second degree heart block or third-degree heart block
  - Patchy uptake on dedicated cardiac FDG-PET (in a pattern consistent with cardiac sarcoidosis)
  - Late gadolinium enhancement on CMR (in a pattern consistent with cardiac sarcoidosis)
  - Positive gallium uptake (in a pattern consistent with cardiac sarcoidosis)
- and
- c) Other causes for the cardiac manifestation(s) have been reasonably excluded

## **JCS 2016 Diagnostic Guidelines for Cardiac Sarcoidosis<sup>13</sup>**

### **Clinical findings defining cardiac involvement**

Cardiac findings should be assessed based on the major criteria and the minor criteria. Clinical findings that satisfy the following 1) or 2) strongly suggest the presence of cardiac involvement.

- 1) Two or more of the five major criteria (a) to (e) are satisfied
- 2) One in the five major criteria (a) to (e) and two or more of the three minor criteria (f) to (h) are satisfied.

### **Criteria for cardiac involvement**

#### 1. Major criteria

- (a) High-grade atrioventricular block (including complete atrioventricular block) or fatal ventricular arrhythmia (e.g., sustained ventricular tachycardia, and ventricular fibrillation)
- (b) Basal thinning of the ventricular septum or abnormal ventricular wall anatomy (ventricular aneurysm, thinning of the middle or upper ventricular septum, regional ventricular wall thickening)
- (c) Left ventricular contractile dysfunction (left ventricular ejection fraction less than 50%) or focal ventricular wall asynergy
- (d) <sup>67</sup>Ga citrate scintigraphy or <sup>18</sup>F-FDG PET reveals abnormally high tracer accumulation in the heart
- (e) Gadolinium-enhanced MRI reveals delayed contrast enhancement of the myocardium

#### 2. Minor criteria

- (f) Abnormal ECG findings: Ventricular arrhythmias (non-sustained ventricular tachycardia, multifocal or frequent premature ventricular contractions), bundle branch block, axis deviation, or abnormal Q waves
- (g) Perfusion defects on myocardial perfusion scintigraphy (SPECT)
- (h) Endomyocardial biopsy: Monocyte infiltration and moderate or severe myocardial interstitial fibrosis

### **Diagnostic guidelines for cardiac sarcoidosis**

1) Histological diagnosis group (those with positive myocardial biopsy findings) - Cardiac sarcoidosis is diagnosed histologically when endomyocardial biopsy or surgical specimens demonstrate non-caseating epithelioid granulomas.

2) Clinical diagnosis group (those with negative myocardial biopsy findings or those not undergoing myocardial biopsy) - The patient is clinically diagnosed as cardiac sarcoidosis when epithelioid granulomas are found in organs other than the heart, and clinical findings strongly suggestive of the above-mentioned cardiac involvement are present and clinical findings strongly suggest the above-mentioned cardiac involvement.

Patients can also be clinically diagnosed as cardiac sarcoidosis when the patient shows clinical findings strongly suggestive of pulmonary or ophthalmic sarcoidosis; at least two of the five characteristic laboratory findings of sarcoidosis and clinical findings strongly suggest the above-mentioned cardiac involvement.

*Note: The latter definition was noted used in our study since all included patients had histologically proven sarcoidosis.*
